# Supplementary material for: Neisseria meningitidis Translation Elongation Factor P and Its Active-Site Arginine Residue Are Essential for Cell Viability
Source: PubMed Central journal article supplement (PMC4739656; doi:10.1371/journal.pone.0147907), 2016-02-03
Supplement: pone.0147907.s001.pdf [file pone.0147907.s001.pdf]

# Yanagisawa *et al.*, Fig. S1

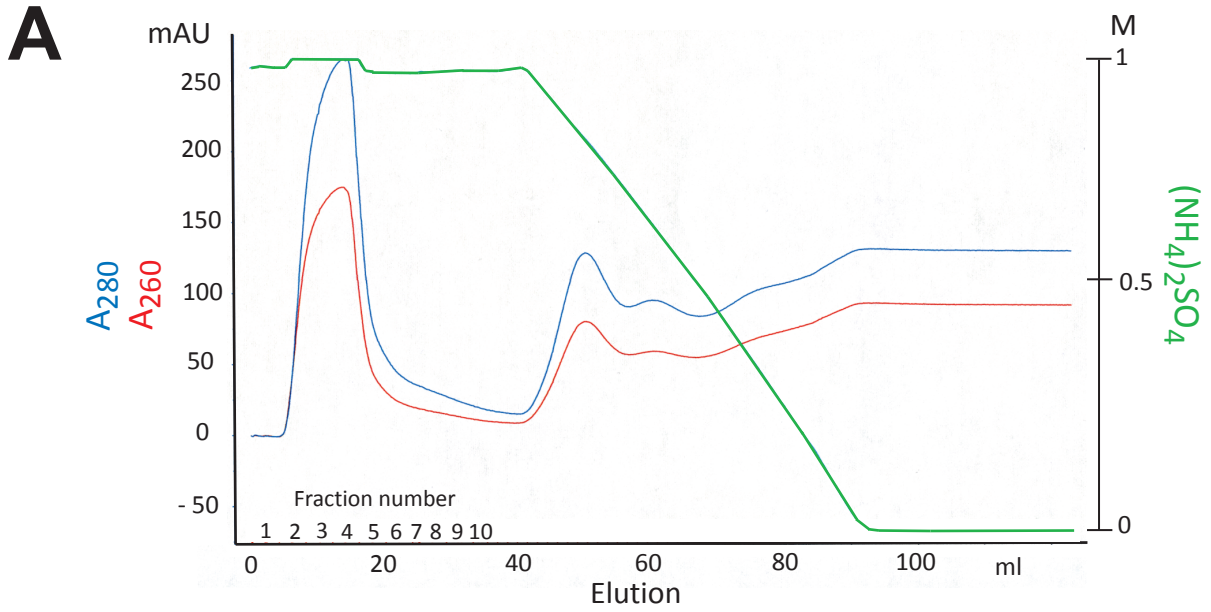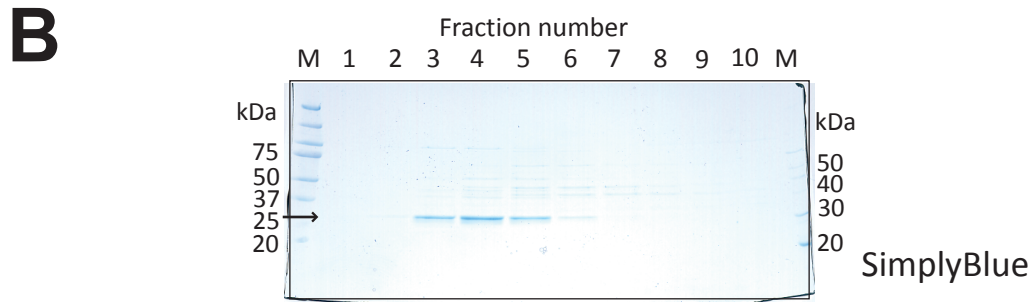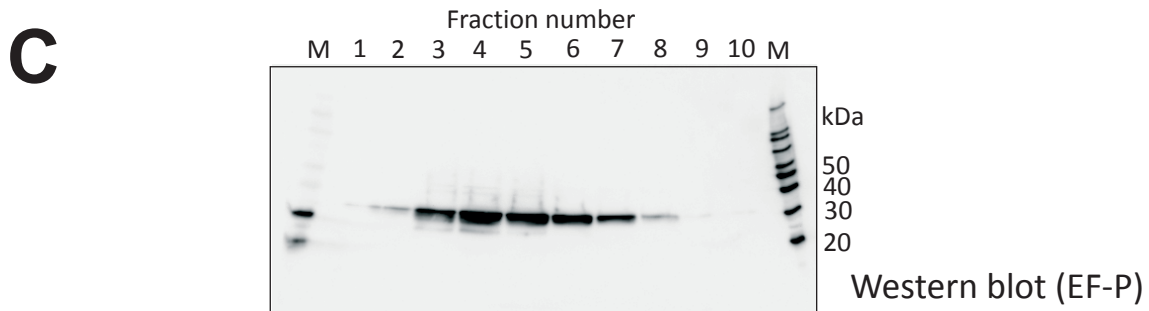

**Fig. S1. Purification of *N. meningitidis* endogenous EF-P by hydrophobic interaction chromatography.**

(A) Elution profile of the endogenous EF-P(*Nm*), fractionated by HiTrap Butyl column chromatography. The absorbances at 280 ( $A_{280}$ ) and 260 nm ( $A_{260}$ ), and the concentration of ammonium sulfate are shown by the red, blue, and green lines, respectively. The endogenous EF-P(*Nm*) was collected from the flow-through fractions.

(B, C) The protein fractions were analyzed by SDS-PAGE (B) and western blotting using a polyclonal antibody against EF-P(*Ec*) (C). The numbers above each lane are the fraction numbers.
