# Supplementary material for: Neisseria meningitidis Translation Elongation Factor P and Its Active-Site Arginine Residue Are Essential for Cell Viability
Source: PubMed Central journal article supplement (PMC4739656; doi:10.1371/journal.pone.0147907), 2016-02-03
Supplement: pone.0147907.s004.pdf [file pone.0147907.s004.pdf]

# Yanagisawa *et al.*, Fig. S4

|        |     |                                                                |     |
|--------|-----|----------------------------------------------------------------|-----|
| HT1125 | 1   | MNTPPFVCWIFCKVIDNFGDIGVSLRLARVLHRELGWQVHLWTDDVSALRALCPDLPDVP   | 60  |
| H44/76 | 1   | MNTPPFVCWIFCKVIDNFGDIGVSWRLARVLHRELGWQVHLWTDDVSALRALCPDLPDVP   | 60  |
| MC58   | 1   | MNTPPFVCWIFCKVIDNFGDIGVSWRLARVLHRELGWQVHLWTDDVSALRALCPDLPDVP   | 60  |
| HT1125 | 61  | CVHQDIHVRTWHSDAADIDTAPVPDAVIETFACDLPENVLHIIRRHKPLWLNWEYLSAEE   | 120 |
| H44/76 | 61  | CVHQDIHVRTWHSDAADIDTAPVPDVVIETFACDLPENVLHIIRRHKPLWLNWEYLSAEE   | 120 |
| MC58   | 61  | CVHQDIHVRTWHSDAADIDTAPVPDVVIETFACDLPENVLHIIRRHKPLWLNWEYLSAEE   | 120 |
| HT1125 | 121 | SNERLHLMPSPQEGVQKYFWFMGFSEKSGGLIRERDYRDAVRFDTEALRQRLMLPEKNAP   | 180 |
| H44/76 | 121 | SNERLHLMPSPQEGVQKYFWFMGFSEKSGGLIRERDYCEAVRFDTEALRERLMLPEKNAS   | 180 |
| MC58   | 121 | SNERLHLMPSPQEGVQKYFWFMGFSEKSGGLIRERDYCEAVRFDTEALRERLMLPEKNAS   | 180 |
| HT1125 | 181 | EWLLFGYRSDVWAKWLEMWQQAGSPMTLLLAGAQIIDSLKQSGIIPQNALQNDGDVFTA    | 240 |
| H44/76 | 181 | EWLLFGYRSDVWAKWLEMWRQAGSPMTLLLAGTQIIDSLKQSGVIPQDALQNDGDVFTA    | 240 |
| MC58   | 181 | EWLLFGYRSDVWAKWLEMWRQAGSPMTLLLAGTQIIDSLKQSGVIPQDALQNDGDVFTA    | 240 |
| HT1125 | 241 | SVRLVKIPFVPQQDFDQLLHLADCAVIRGEDSFVRAQLAGKPPFFWHIYPQDEHVHLDKLH  | 300 |
| H44/76 | 241 | SVRLVKIPFVPQQDFDQLLHLADCAVIRGEDSFVRAQLAGKPPFFWHIYPQDENVHLDKLH  | 300 |
| MC58   | 241 | SVRLVKIPFVPQQDFDQLLHLADCAVIRGEDSFVRAQLAGKPPFFWHIYPQDENVHLDKLH  | 300 |
| HT1125 | 301 | AFWDKAHGFYTPETA SAHRCLSDDLNGGEALSATQRLECWQILQQHQNGWRQGA GAWSRY | 360 |
| H44/76 | 301 | AFWDKAHGFYTPETVSAHRRLSDDLNGGEALSATQRLECWQTLQQHQNGWRQGA EDWSRY  | 360 |
| MC58   | 301 | AFWDKAHGFYTPETVSAHRRLSDDLNGGEALSATQRLECWQTLQQHQNGWRQGA EDWSRY  | 360 |
| HT1125 | 361 | LFGQPSASEKLAAFVSKHQKIR                                         | 382 |
| H44/76 | 361 | LFGQPSAPEKLAAFVSKHQKIR                                         | 382 |
| MC58   | 361 | LFGQPSAPEKLAAFVSKHQKIR                                         | 382 |

**Fig. S4. Sequence alignment of EarP of *N. meningitidis* strains HT1125, H44/76, and MC58**

EarP of *N. meningitidis* HT1125 has 14 different residues from those of *N. meningitidis* H44/76 and MC58.
