# Supplementary material for: Neisseria meningitidis Translation Elongation Factor P and Its Active-Site Arginine Residue Are Essential for Cell Viability
Source: PubMed Central journal article supplement (PMC4739656; doi:10.1371/journal.pone.0147907), 2016-02-03
Supplement: pone.0147907.s005.pdf [file pone.0147907.s005.pdf]

Yanagisawa *et al.*, Fig. S5

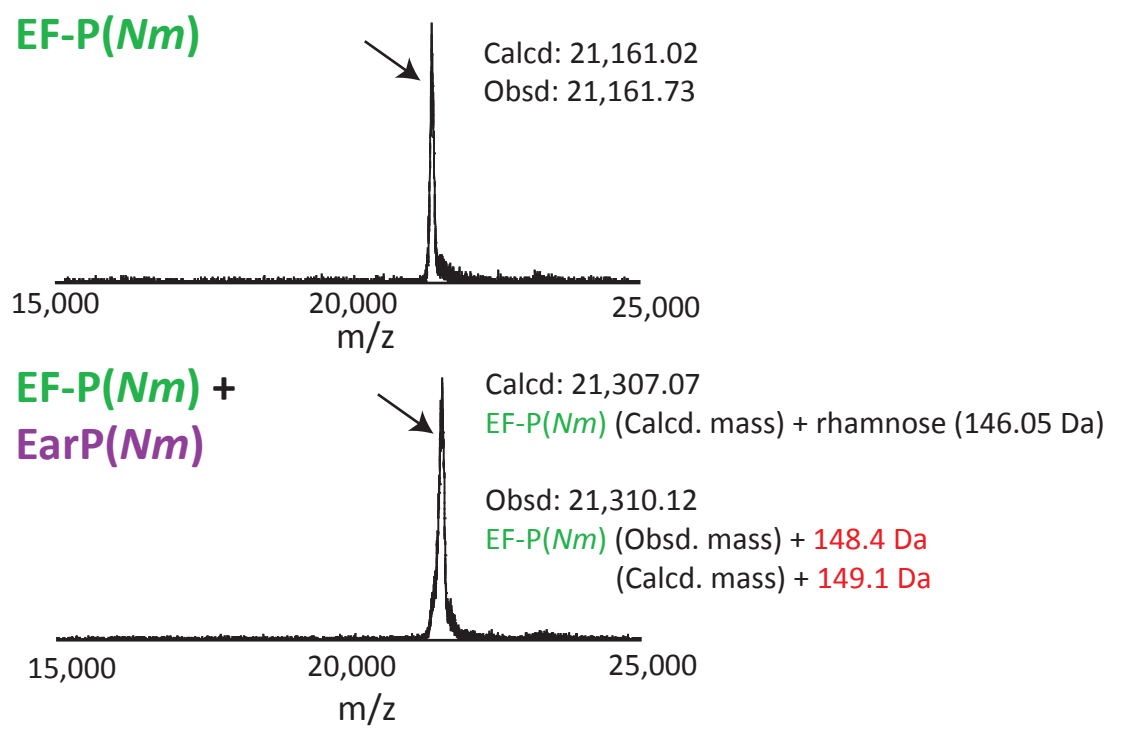

**Fig. S5. MS analysis of the modified and unmodified EF-P(*Nm*)**

MALDI-TOF MS spectra of the recombinant EF-P(*Nm*) purified from *E. coli* cells producing only EF-P(*Nm*) (Fig. 5A, lane 6) (A), and the recombinant EF-P(*Nm*) purified from *E. coli* cells producing both EF-P(*Nm*) and EarP(*Nm*) (Fig. 5A, lane 7) (B).
