# Supplementary material for: Neisseria meningitidis Translation Elongation Factor P and Its Active-Site Arginine Residue Are Essential for Cell Viability
Source: PubMed Central journal article supplement (PMC4739656; doi:10.1371/journal.pone.0147907), 2016-02-03
Supplement: pone.0147907.s006.pdf [file pone.0147907.s006.pdf]

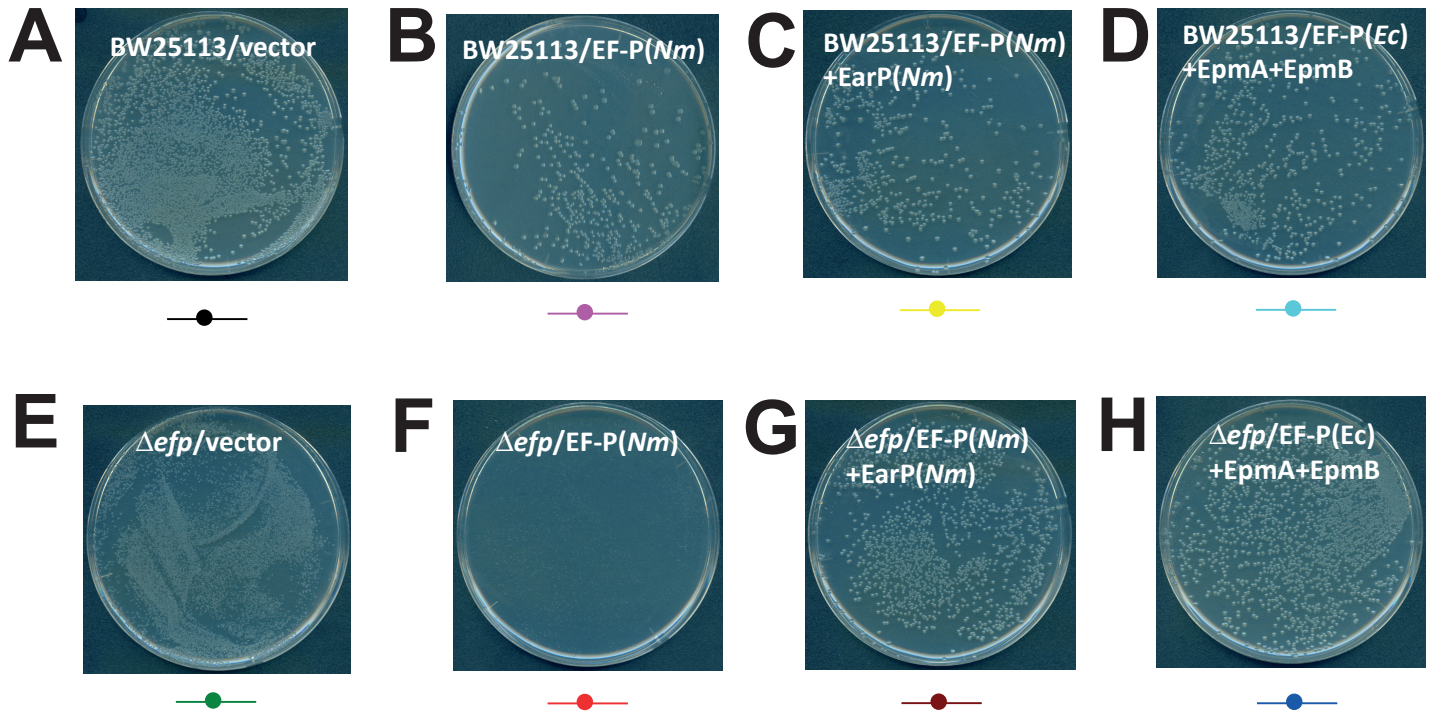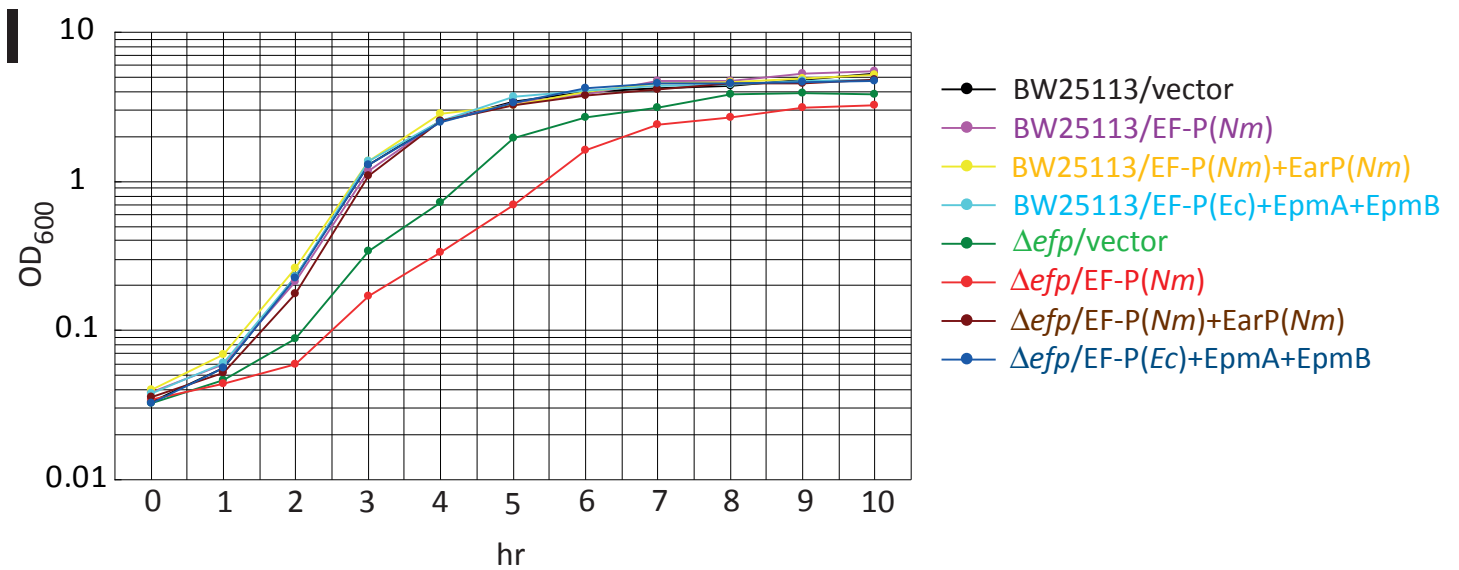

**Fig. S6. Complementation analysis of *E. coli* *efp* null mutant with *N. meningitidis***

**EF-P**

Plasmids pMW119, pMW-*NmE* (a pMW119-derived plasmid for expressing EF-P(*Nm*)), pMW-*NmED* (a pMW119-derived plasmid for expressing EF-P(*Nm*) and EarP(*Nm*)), and pMW-*EcEGY* (a pMW119-derived plasmid for expressing EF-P(*Ec*), EpmA, and EpmB) were introduced into the *E. coli* K12 strain BW25113 and the  $\Delta$ *efp* strain JW4107 (BW25113  $\Delta$ *efp::kan*), and the growth of these strains was compared on LB-Amp plates at 37°C. (A) BW25113/pMW119 (B) BW25113/pMW-*NmE* (C) BW25113/pMW-*NmED* (D) BW25113/pMW-*EcEGY* (E) JW4107/pMW119 (F) JW4107/pMW-*NmE* (G) JW4107/pMW-*NmED* (H) JW4107/pMW-*EcEGY*. (I) The growth curves of these cells in LB broth (Miller) medium in the presence of Amp (50  $\mu$ g/ml) at 37°C are also shown.
