# Supplementary material for: Neisseria meningitidis Translation Elongation Factor P and Its Active-Site Arginine Residue Are Essential for Cell Viability
Source: PubMed Central journal article supplement (PMC4739656; doi:10.1371/journal.pone.0147907), 2016-02-03
Supplement: pone.0147907.s007.pdf [file pone.0147907.s007.pdf]

# Yanagisawa *et al.*, Fig.S7

**A** *E. coli* GntX (Calcd.mass 27731)

MRGSHHHHHHTDPALRP

MLTVPGLCWLCRMPLALGHWGICSVCSRATR  
TDKTLCPQCGLPATHSHLPCGRCLQKPPPWQ  
RLVTVADYAPPLSPLIHQLKFSRRSEIASALSRL  
LLEVLHARRTTGLQLPDRIVSVPLWQRRHWR  
RGFNQSDLLCQPLSRWLHCQWDSEAVTRTRA  
TATQHFLSARLRKRNLKNAFRLELPVQGRHMV  
IVDDVTTGSTVAEIAQLLLRNGAAAVQVWCLC

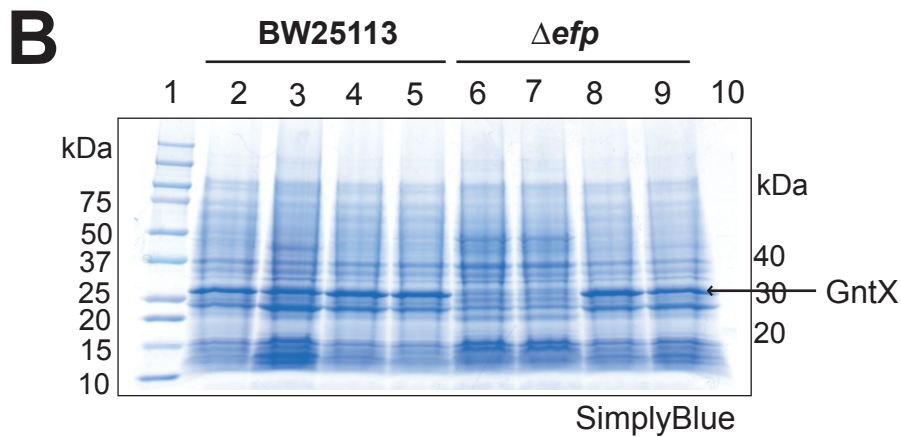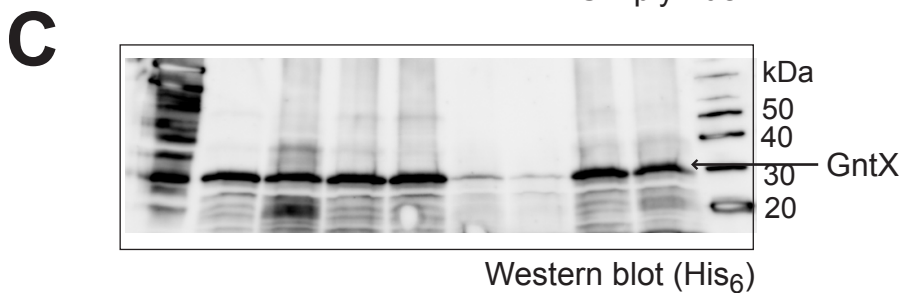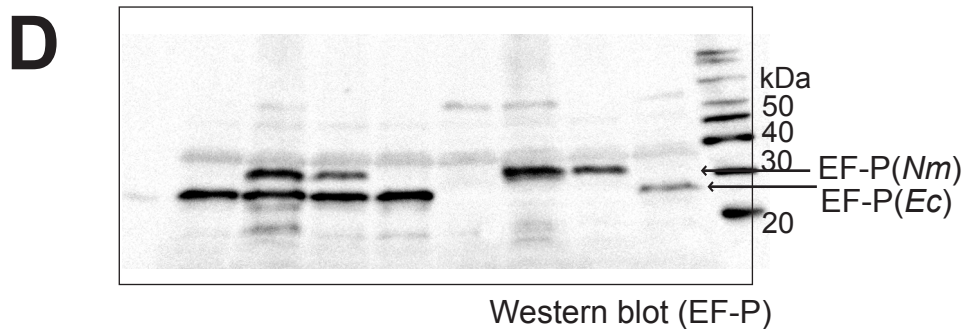

1 **Fig. S7. Restoration of production of the *E. coli* GntX protein, containing proline**  
2 **stretches, in *efp*-deficient cells.**

3 (A) Amino acid sequence of *E. coli* GntX. Proline stretches in GntX are colored red. (B)  
4 Plasmids pMW119, pMW-*NmE*, pMW-*NmED*, and pMW-*EcEGY* were cotransformed  
5 with the GntX plasmid into *E. coli* BW25113 and JW4107 (BW25113  $\Delta$ *efp::kan*) cells.  
6 Whole-cell proteins were subjected to SDS-PAGE, and analyzed for the production of  
7 the full-length GntX protein. Lane 1: molecular mass standards; lane 2:  
8 BW25113/pMW119; lane 3: BW25113/pMW-*NmE*; lane 4: BW25113/pMW-*NmED*;  
9 lane 5: BW25113/pMW-*EcEGY*; lane 6: JW4107/pMW119; lane 7:  
10 JW4107/pMW-*NmE*; lane 8: JW4107/pMW-*NmED*; lane 9: JW4107/pMW-*EcEGY*;  
11 lane 10, MagicMark molecular mass standards. (C) The GntX protein was recognized  
12 by an anti-His<sub>6</sub>-antibody. (D) Detection of the expressed *N. meningitidis* EF-P using an  
13 anti-EF-P antibody.

14
